# Supplementary material
Source: publisher site journal article supplement (https://www.dovepress.com/get_supplementary_file.php?f=231456.docx)
Supplement: Supplementary file 1 [file get_supplementary_file.php]

Table S1. Differentially expressed proteins up-regulated or down-regulated in IH-exposed HUVECs compared with the control.

| Accession | Gene | Description | Fold change | P-value |
| --- | --- | --- | --- | --- |
| Q9NYD3 | PTMA | Prothymosin alpha | 0.834737 | 0.000877 |
| E9PPP0 | FAM203B | Protein FAM203B | 1.14745 | 0.004476 |
| Q9H9B1 | EHMT1 | HistonE-lysine N-methyltransferase EHMT1 | 1.13462 | 0.00933 |
| F8WF48 | SEC62 | Translocation protein SEC62 | 0.834273 | 0.000847 |
| F8WFE7 | RPS19BP1 | Active regulator of SIRT1 | 0.808634 | 0.000113 |
| K7EPT6 | TAF15 | TATA-binding protein-associated factor 2N | 0.841041 | 0.001383 |
| Q8TD30 | GPT2 | Alanine aminotransferase 2 | 0.802461 | 6.65E-05 |
| C9J2C4 | DNAJB6 | DnaJ homolog subfamily B member 6 (Fragment) | 0.832214 | 0.000728 |
| B4DU52 |  | cDNA FLJ50221, highly similar to RNA-binding protein 28 | 0.786283 | 1.56E-05 |
| H0YDY3 | BIRC2 | Baculoviral IAP repeat-containing protein 2 (Fragment) | 0.77618 | 5.99E-06 |
| P04259 | KRT6B | Keratin, type II cytoskeletal 6B | 0.852757 | 0.003094 |
| B0QZ43 | ERLIN1 | ER lipid raft associated 1 (Fragment) | 0.639569 | 2.40E-13 |
| H3BVD1 | SMAD3 | Mothers against decapentaplegic homolog 3 (Fragment) | 1.19153 | 0.000237 |
| F5H7V9 | TNC | Tenascin | 1.18799 | 0.000307 |
| B4DJE5 | FDFT1 | Squalene synthase | 0.656708 | 3.09E-12 |
| G5E9A6 | USP11 | Ubiquitin carboxyl-terminal hydrolase | 0.699174 | 1.04E-09 |
| B7Z7C0 |  | cDNA FLJ53109, highly similar to Serine/threoninE-protein phosphatase 2A 56 kDa regulatory subunit epsilon isoform | 1.1574 | 0.00244 |
| Q7LBC6 | KDM3B | LysinE-specific demethylase 3B | 0.841612 | 0.00144 |
| Q9HAV0 | GNB4 | Guanine nucleotidE-binding protein subunit beta-4 | 0.840423 | 0.001323 |
| P26358 | DNMT1 | DNA (cytosinE-5)-methyltransferase 1 | 0.857143 | 0.004125 |
| B2R4A5 |  | cDNA, FLJ92019, highly similar to Homo sapiens mitochondrial ribosomal protein S14 (MRPS14), nuclear gene encoding mitochondrial protein, mRNA | 0.756841 | 8.54E-07 |
| G3V0F0 | C16orf89 | Putative uncharacterized protein MGC45438 | 1.31071 | 3.01E-09 |
| A8MTP9 | DDX52 | Probable ATP-dependent RNA helicase DDX52 | 1.13937 | 0.007155 |
| Q13017 | ARHGAP5 | Rho GTPasE-activating protein 5 | 1.45907 | 2.38E-18 |
| D1MQ09 | KCNN4 | Small conductance potassium channel type4 transcript variant 3 | 1.13408 | 0.009609 |
| I3L0S1 | PRPSAP2 | Phosphoribosyl pyrophosphate synthasE-associated protein 2 (Fragment) | 0.805181 | 8.40E-05 |
| Q96JB5 | CDK5RAP3 | CDK5 regulatory subunit-associated protein 3 | 0.852936 | 0.003131 |
| Q9NWU5 | MRPL22 | 39S ribosomal protein L22, mitochondrial | 0.859431 | 0.004779 |
| Q8NBF2 | NHLRC2 | NHL repeat-containing protein 2 | 1.43405 | 1.40E-16 |
| P35527 | KRT9 | Keratin, type I cytoskeletal 9 | 0.777649 | 6.91E-06 |
| Q86YJ7 | ANKRD13B | Ankyrin repeat domain-containing protein 13B | 0.860935 | 0.005259 |
| H6VRF8 | KRT1 | Keratin 1 | 0.774071 | 4.88E-06 |
| P02792 | FTL | Ferritin light chain | 1.28734 | 4.04E-08 |
| Q6FHF7 | RABGGTA | RABGGTA protein (Fragment) | 2.23246 | 8.82E-121 |
| F8VWP4 | ARID2 | AT-rich interactive domain-containing protein 2 | 1.20578 | 7.95E-05 |
| B7Z4G0 |  | cDNA FLJ51993, highly similar to Ribosomal protein L7-like 1 | 1.14317 | 0.005755 |
| B3KRJ9 |  | cDNA FLJ34439 fis, clone HLUNG2001146, highly similar to Splicing factor, arginine/serinE-rich 12 | 0.797192 | 4.20E-05 |
| P53794 | SLC5A3 | Sodium/myo-inositol cotransporter | 1.18873 | 0.000291 |
| Q5VXS9 | HERC4 | Hect domain and RLD 4 | 1.16691 | 0.001325 |
| Q9BT69 |  | Putative uncharacterized protein (Fragment) | 0.871416 | 0.009992 |
| B7Z6X8 |  | cDNA FLJ54740, highly similar to 5'-AMP-activated protein kinase subunit gamma-2 | 1.15911 | 0.002191 |
| Q9H5Q4 | TFB2M | Dimethyladenosine transferase 2, mitochondrial | 0.842883 | 0.001575 |
| Q14558 | PRPSAP1 | Phosphoribosyl pyrophosphate synthasE-associated protein 1 | 1.17717 | 0.000662 |
| B4DGM3 | SMARCE1 | SWI/SNF-related matrix-associated actin-dependent regulator of chromatin subfamily E member 1 | 1.17643 | 0.000697 |
| I3L161 | PLSCR3 | Phospholipid scramblase 3 (Fragment) | 1.13404 | 0.00963 |
| G3V5I6 | ZC3H14 | Zinc finger CCCH domain-containing protein 14 | 1.13664 | 0.008342 |
| B4E326 |  | cDNA FLJ57450 | 1.14056 | 0.006686 |
| A3KMG0 | MATN1 | MATN1 protein (Fragment) | 1.15723 | 0.002466 |
| D3DQV2 | hCG_1992840 | Guanine nucleotidE-binding protein subunit gamma | 0.870122 | 0.009252 |
| B2RBE6 |  | cDNA, FLJ95470, highly similar to Homo sapiens homolog of yeast Sec5 (SEC5), mRNA | 0.829332 | 0.000586 |
| B4DUQ1 |  | cDNA FLJ54552, highly similar to Heterogeneous nuclear ribonucleoprotein K | 1.16131 | 0.001905 |
| Q6P1X6 | C8orf82 | UPF0598 protein C8orf82 | 1.16468 | 0.001532 |
| Q5JPB8 | DKFZp686O1117 | Putative uncharacterized protein DKFZp686O1117 | 1.1385 | 0.007514 |
| Q9NTC5 | DKFZp434I1926 | Putative uncharacterized protein DKFZp434I1926 (Fragment) | 0.842374 | 0.00152 |
| Q96T60 | PNKP | Bifunctional polynucleotide phosphatase/kinase | 0.773955 | 4.83E-06 |
| Q7KZ85 | SUPT6H | Transcription elongation factor SPT6 | 1.44905 | 1.25E-17 |
| Q99961 | SH3GL1 | Endophilin-A2 | 0.765744 | 2.13E-06 |
| H0YHH6 | ATP2B1 | Plasma membrane calcium-transporting ATPase 1 (Fragment) | 0.834461 | 0.000859 |
| A6PW79 | C6orf150 | Chromosome 6 open reading frame 150 | 1.13349 | 0.009925 |
| J3QST2 | DHRS4 | Dehydrogenase/reductase SDR family member 4 | 1.15934 | 0.002159 |
| B4DM26 |  | cDNA FLJ57322, highly similar to Homo sapiens lysocardiolipin acyltransferase (LYCAT), transcript variant 1, mRNA | 0.768529 | 2.82E-06 |
| B7Z7F5 |  | cDNA FLJ51581 | 1.15577 | 0.002701 |
| B7WPF4 | USP24 | Ubiquitin carboxyl-terminal hydrolase | 1.14216 | 0.006097 |
| C9JFE4 | GPS1 | COP9 signalosome complex subunit 1 | 0.866718 | 0.007533 |
| B4DED1 |  | cDNA FLJ53505, highly similar to ChaperonE-activity of bc1 complex-like, mitochondrial | 1.23439 | 7.22E-06 |
| D6RFM7 | ANAPC4 | AnaphasE-promoting complex subunit 4 | 0.802383 | 6.61E-05 |
| B4DKY2 |  | cDNA FLJ52322, highly similar to TyrosinE-protein phosphatase non-receptortype 12 (EC 3.1.3.48) | 1.16233 | 0.001784 |
| B3KMB8 |  | cDNA FLJ10654 fis, clone NT2RP2005901, highly similar to FAST kinase domains-containing protein 2 | 0.869333 | 0.008825 |
| Q8IYB3 | SRRM1 | Serine/arginine repetitive matrix protein 1 | 0.798166 | 4.58E-05 |
| Q8IXH7 | TH1L | Negative elongation factor C/D | 0.821981 | 0.000333 |
| B4DS83 |  | cDNA FLJ53179, highly similar to Nucleolar protein 10 | 1.17455 | 0.000793 |
| C9IZ83 | DNAJC2 | DnaJ homolog subfamily C member 2 (Fragment) | 0.863705 | 0.006256 |
| B4DMD3 |  | cDNA FLJ58174, highly similar to WW domain-binding protein 11 | 1.2391 | 4.73E-06 |
| Q96EK9 | KTI12 | Protein KTI12 homolog | 1.34561 | 4.36E-11 |
| B4E206 |  | cDNA FLJ55441, highly similar to Nuclear pore complex protein Nup133 | 0.854213 | 0.003407 |
| J3KS45 | TMCO1 | Transmembrane and coiled-coil domain-containing protein 1 (Fragment) | 0.751874 | 5.05E-07 |
| Q96PU5 | NEDD4L | E3 ubiquitin-protein ligase NEDD4-like | 1.13422 | 0.009538 |
| Q96H44 | GTPBP3 | GTPBP3 protein (Fragment) | 1.41821 | 1.65E-15 |
| O75208 | COQ9 | Ubiquinone biosynthesis protein COQ9, mitochondrial | 0.790357 | 2.27E-05 |
| B5MC98 | PREB | Prolactin regulatory element-binding protein | 1.17179 | 0.000957 |
| Q9Y5Y5 | PEX16 | Peroxisomal membrane protein PEX16 | 0.84254 | 0.001538 |
| Q9H7D7 | WDR26 | WD repeat-containing protein 26 | 1.16176 | 0.00185 |
| H0YI50 | ERGIC2 | Endoplasmic reticulum-Golgi intermediate compartment protein 2 (Fragment) | 0.782003 | 1.05E-05 |
| Q9UG63 | ABCF2 | ATP-binding cassette sub-family F member 2 | 0.859022 | 0.004656 |
| H7BYN4 | KIF23 | Kinesin-like protein KIF23 | 0.796052 | 3.80E-05 |
| O43715 | TRIAP1 | TP53-regulated inhibitor of apoptosis 1 | 1.17267 | 0.000901 |
| Q9NW64 | RBM22 | PrE-mRNA-splicing factor RBM22 | 0.869509 | 0.008919 |
| Q7L9L4 | MOB1B | MOB kinase activator 1B | 0.847174 | 0.002122 |
| Q6PJG6 | BRAT1 | BRCA1-associated ATM activator 1 | 1.21927 | 2.66E-05 |
| E9PL82 | CD151 | CD151 antigen | 0.870688 | 0.009569 |
| Q9BT22 | ALG1 | Chitobiosyldiphosphodolichol beta-mannosyltransferase | 0.868687 | 0.008489 |
| B3KY04 |  | cDNA FLJ46506 fis, clone THYMU3030752, highly similar to BTB/POZ domain-containing protein KCTD12 | 1.14589 | 0.004908 |
| H3BR50 | ATP6V0C | V-type proton ATPase 16 kDa proteolipid subunit | 1.18409 | 0.000407 |
| F6PQP6 | EPN2 | Epsin-2 (Fragment) | 0.804347 | 7.82E-05 |
| K7EMY7 | HDHD2 | Haloacid dehalogenasE-like hydrolase domain-containing protein 2 (Fragment) | 0.62438 | 2.25E-14 |
| Q8TEW0 | PARD3 | Partitioning defective 3 homolog | 0.828781 | 0.000562 |
| Q9ULF5 | SLC39A10 | Zinc transporter ZIP10 | 1.22631 | 1.46E-05 |
| Q9H7N4 | SCAF1 | Splicing factor, arginine/serinE-rich 19 | 0.836785 | 0.001019 |
| B2RAX6 |  | cDNA, FLJ95176, Homo sapiens CGI-48 protein (CGI-48), mRNA | 0.814849 | 0.000188 |
| Q7RTP6 | MICAL3 | Protein-methionine sulfoxide oxidase MICAL3 | 1.19886 | 0.000136 |
| Q96TC7 | FAM82A2 | Regulator of microtubule dynamics protein 3 | 1.13755 | 0.007927 |
| Q13043 | STK4 | Serine/threoninE-protein kinase 4 | 0.837048 | 0.001038 |
| Q2NLA0 | COPG2 | Coatomer subunit gamma | 1.19857 | 0.000139 |
| E7EX54 | MAPK14 | Mitogen-activated protein kinase 14 (Fragment) | 0.828042 | 0.000531 |
| D2Y6Y7 | ATP6 | ATP synthase subunit 6 (Fragment) | 0.827141 | 0.000496 |
| B7Z6I3 |  | DNA ligase | 0.87116 | 0.009842 |
| A2ABL5 | GTF2H4 | General transcription factor IIH subunit 4 (Fragment) | 0.855054 | 0.0036 |
| H7C235 | SMPD4 | Sphingomyelin phosphodiesterase 4 (Fragment) | 0.818999 | 0.000263 |
| Q6YP21 | CCBL2 | KynureninE--oxoglutarate transaminase 3 | 1.13355 | 0.009892 |
| O96011 | PEX11B | Peroxisomal membrane protein 11B | 0.857882 | 0.004327 |
| Q53TH5 | ORC4L | Putative uncharacterized protein ORC4L (Fragment) | 0.863827 | 0.006304 |
| C9IZF4 | PPP4R2 | HCG14948, isoform CRA_a | 0.827631 | 0.000515 |
| Q5T1M7 | PRPF4 | 60 kDa U4/U6 snRNP-specific spliceosomal protein | 1.4457 | 2.16E-17 |
| G3V4P2 | METTL17 | MethyltransferasE-like protein 17, mitochondrial (Fragment) | 1.75188 | 3.03E-46 |
| Q8NBX0 | SCCPDH | Saccharopine dehydrogenasE-like oxidoreductase | 1.47027 | 3.56E-19 |
| B4DHJ2 |  | cDNA FLJ59326, highly similar to Protein FAM21C | 1.13568 | 0.008796 |
| P36551 | CPOX | Coproporphyrinogen-III oxidase, mitochondrial | 1.13361 | 0.009863 |
| Q14118 | DAG1 | Dystroglycan | 1.27565 | 1.38E-07 |
| Q92896 | GLG1 | Golgi apparatus protein 1 | 0.864914 | 0.006743 |
| E9PGT1 | TSN | Translin | 1.2175 | 3.08E-05 |
| Q8N7K6 | CASC4 | Cancer susceptibility candidate 4, isoform CRA_g | 1.23326 | 7.98E-06 |
| F5GXJ6 | PPP2R2D | Serine/threoninE-protein phosphatase 2A 55 kDa regulatory subunit B delta isoform | 1.14134 | 0.006393 |
| B4DGL8 | ABCB7 | ATP-binding cassette sub-family B member 7, mitochondrial (Fragment) | 0.836071 | 0.000967 |
| Q9BZQ8 | FAM129A | Protein Niban | 0.688274 | 2.50E-10 |
| K4ENJ5 |  | Beta actin (Fragment) | 1.14829 | 0.004258 |
| Q9BV19 | C1orf50 | Uncharacterized protein C1orf50 | 0.81913 | 0.000265 |
| H0UI22 | RARSL | Arginyl-tRNA synthetasE-like, isoform CRA_e | 0.803701 | 7.40E-05 |
| Q9BRJ2 | MRPL45 | 39S ribosomal protein L45, mitochondrial | 1.43208 | 1.92E-16 |
| Q96HI4 | NMT1 | Glycylpeptide N-tetradecanoyltransferase (Fragment) | 0.826923 | 0.000488 |
| G3V117 | ENY2 | Enhancer of yellow 2 homolog (Drosophila), isoform CRA_c | 1.17719 | 0.000661 |
| Q9NQ88 | TIGAR | FructosE-2,6-bisphosphatase TIGAR | 0.797536 | 4.33E-05 |
| O00629 | KPNA4 | Importin subunit alpha-4 | 1.15411 | 0.002993 |
| J3KRS1 | DHRS7B | Dehydrogenase/reductase SDR family member 7B (Fragment) | 0.784003 | 1.26E-05 |
| B2R6J4 |  | cDNA, FLJ92975, highly similar to Homo sapiens nucleosome assembly protein 1-like 4 (NAP1L4), mRNA | 0.833007 | 0.000772 |
| B3KXN5 |  | cDNA FLJ45768 fis, clone NETRP2000961, highly similar to Cytosolic purine 5'-nucleotidase (EC 3.1.3.5) | 1.21343 | 4.30E-05 |
| B7Z2V7 |  | cDNA FLJ54602, highly similar to Syntaxin-binding protein 1 | 1.1415 | 0.006334 |
| Q9Y6X5 | ENPP4 | Ectonucleotide pyrophosphatase/phosphodiesterase family member 4 | 0.822765 | 0.000354 |
| Q9P1F3 | ABRACL | Costars family protein ABRACL | 0.859887 | 0.00492 |
| B4DHV1 |  | cDNA FLJ52460, moderately similar to Zinc finger protein-like 1 | 1.29098 | 2.73E-08 |
| B4DHW9 |  | cDNA FLJ56439, highly similar to Pantothenate kinase 4 (EC 2.7.1.33) | 0.796476 | 3.94E-05 |
| B4DWW1 | ARL1 | ADP-ribosylation factor-like protein 1 | 1.22876 | 1.18E-05 |
| B4DUA6 |  | cDNA FLJ61409, highly similar to 1-acyl-sn-glycerol-3-phosphate acyltransferase gamma (EC 2.3.1.51) | 1.16841 | 0.0012 |
| B4DUE1 |  | DNA ligase | 0.661546 | 6.23E-12 |
| P27694 | RPA1 | Replication protein A 70 kDa DNA-binding subunit | 0.829183 | 0.000579 |
| P02795 | MT2A | Metallothionein-2 | 0.870351 | 0.009379 |

Notes: A total of 145 differentially expressed proteins were identified between IH and control group, with 67 were up-regulated and 78 were down-regulated in IH group. The Uniprot accessions, gene names, fold changes and *p* values of all the differentially expressed proteins are listed.

Table S2. Differentially expressed proteins up-regulated or down-regulated in IH+ estradiol (E2) group compared with IH group.

| Accession | Gene | Description | Fold change | P value |
| --- | --- | --- | --- | --- |
| Q9H9B1 | EHMT1 | HistonE-lysine N-methyltransferase EHMT1 | 0.802451 | 5.55E-06 |
| F8WF48 | SEC62 | Translocation protein SEC62 | 1.18219 | 0.000201 |
| Q8TD30 | GPT2 | Alanine aminotransferase 2 | 1.33101 | 1.56E-11 |
| C9J2C4 | DNAJB6 | DnaJ homolog subfamily B member 6 (Fragment) | 1.23945 | 1.05E-06 |
| Q8IV08 | PLD3 | Phospholipase D3 | 1.21873 | 8.17E-06 |
| B4DU52 | RBM28 | cDNA FLJ50221, highly similar to RNA-binding protein 28 | 1.22975 | 2.81E-06 |
| Q9BU76 | MMTAG2 | Multiple myeloma tumor-associated protein 2 | 0.878714 | 0.005396 |
| H0YDY3 | BIRC2 | Baculoviral IAP repeat-containing protein 2 (Fragment) | 1.21707 | 9.56E-06 |
| B4DXZ1 | ASNS | Asparagine synthetase | 1.21183 | 1.56E-05 |
| C9IZG4 | CUTA | Protein CutA | 1.14387 | 0.003289 |
| B0QZ43 | ERLIN1 | ER lipid raft associated 1 (Fragment) | 1.42229 | 8.15E-18 |
| H3BVD1 | SMAD3 | Mothers against decapentaplegic homolog 3 (Fragment) | 0.886051 | 0.008974 |
| A8MXV4 | NUDT19 | Nucleoside diphosphatE-linked moiety X motif 19, mitochondrial | 1.2489 | 3.9E-07 |
| B4DSN2 |  | cDNA FLJ52740, highly similar to Magnesium transporter MRS2L, mitochondrial | 1.14721 | 0.002637 |
| B3KRS5 | HDAC2 | Histone deacetylase | 0.794381 | 2.25E-06 |
| B4DY28 |  | cDNA FLJ61189, highly similar to Cysteine and glycinE-rich protein 1 | 1.1569 | 0.001355 |
| Q03164 | KMT2A | HistonE-lysine N-methyltransferase MLL | 0.864486 | 0.001865 |
| Q7LBC6 | KDM3B | LysinE-specific demethylase 3B | 1.16906 | 0.000558 |
| D6PSQ9 | SEPHS1 | Selenide, water dikinase 1 | 0.832772 | 0.000122 |
| Q9HAV0 | GNB4 | Guanine nucleotidE-binding protein subunit beta-4 | 1.27796 | 1.48E-08 |
| P26358 | DNMT1 | DNA (cytosinE-5)-methyltransferase 1 | 1.47674 | 2.9E-22 |
| B2RDZ9 |  | cDNA, FLJ96850 | 0.851763 | 0.000663 |
| J3QRU4 | VAMP2 | VesiclE-associated membrane protein 2 | 0.884564 | 0.008112 |
| B2R4A5 |  | cDNA, FLJ92019, highly similar to Homo sapiens mitochondrial ribosomal protein S14 (MRPS14), nuclear gene encoding mitochondrial protein, mRNA | 1.15877 | 0.001187 |
| Q9P0J7 | KCMF1 | E3 ubiquitin-protein ligase KCMF1 | 0.823426 | 4.93E-05 |
| G3V0F0 | C16orf89 | Putative uncharacterized protein MGC45438 | 0.767812 | 9.16E-08 |
| B4DT15 |  | cDNA FLJ56150, highly similar to Zinc phosphodiesterase ELAC protein 2 (EC 3.1.26.11) | 0.88153 | 0.00658 |
| D1MQ09 | KCNN4 | Small conductance potassium channel type4 transcript variant 3 | 0.825875 | 6.27E-05 |
| Q86VR2 | RETREG3 | Protein FAM134C | 0.855315 | 0.000892 |
| B2RWP0 | SIPA1L3 | Signal-induced proliferation-associated 1 like 3 | 1.15464 | 0.001587 |
| D3DP75 | RAB3GAP1 | RAB3 GTPase activating protein subunit 1 (Catalytic), isoform CRA_a | 0.810468 | 1.31E-05 |
| Q86YJ7 | ANKRD13B | Ankyrin repeat domain-containing protein 13B | 1.14023 | 0.004166 |
| Q9HC07 | TMEM165 | Transmembrane protein 165 | 0.886794 | 0.009436 |
| E9PQV6 | MICU1 | Calcium uptake protein 1, mitochondrial | 0.757639 | 2.44E-08 |
| G3V126 | ATP6V1H | ATPase, H+ transporting, lysosomal 50/57kDa, V1 subunit H, isoform CRA_c | 0.877793 | 0.005052 |
| Q6FHF7 | RABGGTA | RABGGTA protein (Fragment) | 0.4717 | 4.04E-34 |
| Q86YY1 |  | NCOR isoform c | 0.857357 | 0.001055 |
| B3KRJ9 | #N/A | cDNA FLJ34439 fis, clone HLUNG2001146, highly similar to Splicing factor, arginine/serinE-rich 12 | 1.34809 | 1.35E-12 |
| P49750 | YLPM1 | YLP motif-containing protein 1 | 1.20035 | 4.37E-05 |
| B3KUF6 | #N/A | cDNA FLJ39748 fis, clone SMINT2017436, highly similar to Homo sapiens haloacid dehalogenasE-like hydrolase domain containing 3 (HDHD3), mRNA | 0.835583 | 0.000158 |
| Q2VPK5 | CTU2 | Cytoplasmic tRNA 2-thiolation protein 2 | 0.858974 | 0.001203 |
| Q59FQ8 | #N/A | Spinster variant (Fragment) | 0.887472 | 0.009874 |
| Q9BXP8 | PAPPA2 | Pappalysin-2 | 1.13819 | 0.004744 |
| B4DMV0 | #N/A | cDNA FLJ59352, highly similar to Brain-specific angiogenesis inhibitor1-associated protein 2 | 0.820422 | 3.66E-05 |
| B4DDF9 | #N/A | Annexin | 0.816636 | 2.49E-05 |
| J3KNH7 | #N/A | Sentrin-specific protease 3 | 1.13357 | 0.006336 |
| Q9H5Q4 | TFB2M | Dimethyladenosine transferase 2, mitochondrial | 1.1414 | 0.003863 |
| Q14558 | PRPSAP1 | Phosphoribosyl pyrophosphate synthasE-associated protein 1 | 0.818156 | 2.91E-05 |
| B4DGM3 | SMARCE1 | SWI/SNF-related matrix-associated actin-dependent regulator of chromatin subfamily E member 1 | 0.838095 | 0.000199 |
| I3L161 | PLSCR3 | Phospholipid scramblase 3 (Fragment) | 0.877112 | 0.004811 |
| B4E326 | #N/A | cDNA FLJ57450 | 0.753941 | 1.49E-08 |
| A3KMG0 | MATN1 | MATN1 protein (Fragment) | 0.868592 | 0.002561 |
| D3DQV2 | hCG_1992840 | Guanine nucleotidE-binding protein subunit gamma | 1.37553 | 2.05E-14 |
| B7Z768 | #N/A | cDNA FLJ52138, highly similar to NADH dehydrogenase (ubiquinone) 1 alpha subcomplex subunit 8 (EC 1.6.5.3) | 0.854939 | 0.000865 |
| E5RJ86 | ARMC1 | Armadillo repeat-containing protein 1 (Fragment) | 1.21399 | 1.28E-05 |
| B2RBE6 | #N/A | cDNA, FLJ95470, highly similar to Homo sapiens homolog of yeast Sec5 (SEC5), mRNA | 1.32636 | 2.97E-11 |
| Q8TEF1 | FLJ00246 | FLJ00246 protein (Fragment) | 1.19316 | 8.12E-05 |
| B4DUQ1 | #N/A | cDNA FLJ54552, highly similar to Heterogeneous nuclear ribonucleoprotein K | 0.826713 | 6.81E-05 |
| B7Z8Z8 | #N/A | cDNA FLJ61702, highly similar to 80 kDa MCM3-associated protein | 1.19872 | 5.04E-05 |
| Q3KQV9 | UAP1L1 | UDP-N-acetylhexosamine pyrophosphorylasE-like protein 1 | 1.17272 | 0.000423 |
| Q70CQ2 | USP34 | Ubiquitin carboxyl-terminal hydrolase 34 | 0.844588 | 0.000357 |
| H0Y5G7 | NBAS | Neuroblastoma-amplified sequence (Fragment) | 1.15241 | 0.001853 |
| Q3LXA3 | TKFC | Bifunctional ATP-dependent dihydroxyacetone kinase/FAD-AMP lyase (cyclizing) | 0.862578 | 0.001605 |
| B3KU60 | #N/A | cDNA FLJ39235 fis, clone OCBBF2007829, highly similar to Mus musculus fatso protein | 1.26147 | 9.87E-08 |
| Q8N3F8 | MICALL1 | MICAL-like protein 1 | 1.15377 | 0.001687 |
| B3KTS4 | #N/A | cDNA FLJ38665 fis, clone HLUNG2003378, highly similar to Rho guanine nucleotide exchange factor 16 | 1.14721 | 0.002637 |
| Q9NTC5 | DKFZp434I1926 | Putative uncharacterized protein DKFZp434I1926 (Fragment) | 1.15796 | 0.001257 |
| Q15059 | BRD3 | Bromodomain-containing protein 3 | 0.868854 | 0.002612 |
| Q99961 | SH3GL1 | Endophilin-A2 | 1.21192 | 1.54E-05 |
| H0YHH6 | ATP2B1 | Plasma membrane calcium-transporting ATPase 1 (Fragment) | 1.12691 | 0.00947 |
| Q59GB7 | #N/A | Solute carrier family 12 (Sodium/potassium/chloride transporters), member 2 variant (Fragment) | 0.887104 | 0.009634 |
| F5H2H5 | #N/A | Ankyrin repeat and LEM domain-containing protein 2 | 0.824142 | 5.29E-05 |
| B7Z7F5 | #N/A | cDNA FLJ51581 | 0.864575 | 0.001878 |
| C9JFE4 | GPS1 | COP9 signalosome complex subunit 1 | 1.19503 | 6.92E-05 |
| P00568 | AK1 | Adenylate kinase isoenzyme 1 | 0.817633 | 2.76E-05 |
| D6RFM7 | ANAPC4 | AnaphasE-promoting complex subunit 4 | 1.24566 | 5.5E-07 |
| Q9BVI4 | NOC4L | Nucleolar complex protein 4 homolog | 0.838655 | 0.00021 |
| Q5F1R6 | DNAJC21 | DnaJ homolog subfamily C member 21 | 1.14034 | 0.004136 |
| B2R8W4 | #N/A | cDNA, FLJ94092 | 0.874186 | 0.00389 |
| B4DHE5 | #N/A | cDNA FLJ54675, highly similar to Homo sapiens leucine zipper protein 5 (LUZP5), mRNA | 1.15508 | 0.00154 |
| Q8IYB3 | SRRM1 | Serine/arginine repetitive matrix protein 1 | 1.36698 | 7.81E-14 |
| Q8IXH7 | NELFCD | Negative elongation factor C/D | 1.16785 | 0.000611 |
| B5BU72 | PICALM | Phosphatidylinositol-binding clathrin assembly protein isoform 2 | 1.15331 | 0.001742 |
| C9IZ83 | DNAJC2 | DnaJ homolog subfamily C member 2 (Fragment) | 0.836222 | 0.000168 |
| B4DMD3 | #N/A | cDNA FLJ58174, highly similar to WW domain-binding protein 11 | 0.8377 | 0.000192 |
| J3KS45 | TMCO1 | Transmembrane and coiled-coil domain-containing protein 1 (Fragment) | 1.80491 | 2.98E-60 |
| E5RGN3 | ATOX1 | Copper transport protein ATOX1 | 0.837916 | 0.000196 |
| P31937 | HIBADH | 3-hydroxyisobutyrate dehydrogenase, mitochondrial | 0.880298 | 0.006036 |
| Q96H44 | GTPBP3 | GTPBP3 protein (Fragment) | 0.724767 | 2.35E-10 |
| A8K168 | #N/A | Malic enzyme | 0.780058 | 4.19E-07 |
| P08240 | SRPRA | Signal recognition particle receptor subunit alpha | 0.881967 | 0.006783 |
| O75208 | COQ9 | Ubiquinone biosynthesis protein COQ9, mitochondrial | 1.15826 | 0.001231 |
| A8K644 | SFRS4 | Splicing factor, arginine/serinE-rich 4, isoform CRA_b | 0.88219 | 0.006889 |
| Q9C0C9 | UBE2O | Ubiquitin-conjugating enzyme E2 O | 1.36399 | 1.24E-13 |
| Q9Y5Y5 | PEX16 | Peroxisomal membrane protein PEX16 | 1.37061 | 4.45E-14 |
| F5H5T2 | ALG10 | Dol-P-Glc:Glc(2)Man(9)GlcNAc(2)-PP-Dol alpha-1,2-glucosyltransferase | 1.16063 | 0.001039 |
| Q9H7D7 | WDR26 | WD repeat-containing protein 26 | 0.879496 | 0.005704 |
| B2R5M8 | #N/A | Isocitrate dehydrogenase [NADP] | 1.15618 | 0.001425 |
| Q9NWB6 | ARGLU1 | Arginine and glutamatE-rich protein 1 | 1.14174 | 0.003781 |
| B8ZZK5 | PDE6D | Phosphodiesterase 6D, cGMP-specific, rod, delta, isoform CRA_a | 1.1998 | 4.58E-05 |
| Q86Y56 | DNAAF5 | HEAT repeat-containing protein 2 | 0.887518 | 0.009905 |
| P83876 | TXNL4A | Thioredoxin-like protein 4A | 1.14685 | 0.002701 |
| Q9NQG5 | RPRD1B | Regulation of nuclear prE-mRNA domain-containing protein 1B | 1.13348 | 0.006368 |
| E9PS77 | BSDC1 | BSD domain-containing protein 1 (Fragment) | 0.872388 | 0.003407 |
| H7BYN4 | KIF23 | Kinesin-like protein KIF23 | 1.51578 | 8.88E-26 |
| O43715 | TRIAP1 | TP53-regulated inhibitor of apoptosis 1 | 0.811107 | 1.4E-05 |
| B3KPK0 | #N/A | cDNA FLJ31885 fis, clone NT2RP7002982, highly similar to Prolyl 3-hydroxylase 2 (EC 1.14.11.7) | 1.18879 | 0.000117 |
| G3V3U6 | MRPL52 | 39S ribosomal protein L52, mitochondrial | 1.21298 | 1.4E-05 |
| Q6PJG6 | BRAT1 | BRCA1-associated ATM activator 1 | 0.768082 | 9.48E-08 |
| K7EIV2 | #N/A | Deoxyhypusine hydroxylase (Fragment) | 1.20435 | 3.07E-05 |
| J3QKK8 | FAM213B | Prostamide/prostaglandin F synthase (Fragment) | 1.12884 | 0.008442 |
| Q59FC8 | #N/A | Eukaryotic translation initiation factor 2B, subunit 4 delta long isoform variant (Fragment) | 0.880326 | 0.006048 |
| E4W6B6 | RPL27 | RPL27/NME2 fusion protein (Fragment) | 1.17913 | 0.000256 |
| B1AA15 | HCCS1 | Gastric cancer hepatocellular carcinoma suppressor 1 variant | 1.16591 | 0.000706 |
| Q9BTV5 | FSD1 | Fibronectin type III and SPRY domain-containing protein 1 | 0.876086 | 0.004468 |
| K7EMY7 | HDHD2 | Haloacid dehalogenasE-like hydrolase domain-containing protein 2 (Fragment) | 1.68623 | 2.69E-44 |
| Q8TEW0 | PARD3 | Partitioning defective 3 homolog | 1.26311 | 8.21E-08 |
| Q9ULF5 | SLC39A10 | Zinc transporter ZIP10 | 0.81659 | 2.48E-05 |
| Q05048 | CSTF1 | Cleavage stimulation factor subunit 1 | 0.887048 | 0.009597 |
| H0YLX4 | WDR72 | WD repeat-containing protein 72 | 1.16827 | 0.000592 |
| Q9H269 | VPS16 | Vacuolar protein sorting-associated protein 16 homolog | 0.877514 | 0.004953 |
| Q9H7N4 | SCAF1 | Splicing factor, arginine/serinE-rich 19 | 1.21541 | 1.12E-05 |
| Q92979 | EMG1 | Ribosomal RNA small subunit methyltransferase NEP1 | 1.14415 | 0.00323 |
| Q5JU69 | TOR2A | Torsin-2A | 0.865229 | 0.001977 |
| Q9Y512 | SAMM50 | Sorting and assembly machinery component 50 homolog | 1.22123 | 6.44E-06 |
| E9PB39 | ARHGEF10 | Rho guanine nucleotide exchange factor 10 | 1.24077 | 9.17E-07 |
| B4E2Q6 | #N/A | Regulation of nuclear prE-mRNA domain-containing protein 2 | 1.13326 | 0.006457 |
| Q13043 | STK4 | Serine/threoninE-protein kinase 4 | 1.16091 | 0.001018 |
| Q06124 | PTPN11 | TyrosinE-protein phosphatase non-receptor type 11 | 1.1965 | 6.1E-05 |
| E7EX54 | MAPK14 | Mitogen-activated protein kinase 14 (Fragment) | 1.24274 | 7.48E-07 |
| D2Y6Y7 | ATP6 | ATP synthase subunit 6 (Fragment) | 1.42919 | 2.38E-18 |
| F5H2L4 | ACOT13 | Acyl-coenzyme A thioesterase 13 | 1.13059 | 0.007597 |
| Q96T76 | MMS19 | MMS19 nucleotide excision repair protein homolog | 0.879872 | 0.005857 |
| C9JN61 | DLG1 | Disks large homolog 1 (Fragment) | 0.814897 | 2.08E-05 |
| Q6VY07 | PACS1 | Phosphofurin acidic cluster sorting protein 1 | 1.2823 | 8.8E-09 |
| E9PE17 | MRPS17 | 28S ribosomal protein S17, mitochondrial (Fragment) | 0.822198 | 4.37E-05 |
| A2ABL5 | GTF2H4 | General transcription factor IIH subunit 4 (Fragment) | 0.886369 | 0.00917 |
| G3XAN4 | TRAM1 | Translocating chain-associated membrane protein 1 | 1.17712 | 0.0003 |
| H7C235 | SMPD4 | Sphingomyelin phosphodiesterase 4 (Fragment) | 1.16857 | 0.000579 |
| Q9P032 | NDUFAF4 | NADH dehydrogenase [ubiquinone] 1 alpha subcomplex assembly factor 4 | 1.20816 | 2.18E-05 |
| O95330 |  | Putative uncharacterized protein | 1.15266 | 0.001821 |
| E7EP42 | TIMM23B | Putative mitochondrial import inner membrane translocase subunit Tim23B | 0.862029 | 0.001537 |
| B9EG55 | GIGYF2 | GRB10 interacting GYF protein 2 | 0.850293 | 0.000585 |
| O15084 | ANKRD28 | Serine/threoninE-protein phosphatase 6 regulatory ankyrin repeat subunit A | 0.85759 | 0.001075 |
| Q6LER7 | GLA | Alpha-galactosidase A (Fragment) | 1.13069 | 0.007552 |
| Q5T1M7 | PRPF4 | 60 kDa U4/U6 snRNP-specific spliceosomal protein | 0.724999 | 2.43E-10 |
| Q4G176 | ACSF3 | Acyl-CoA synthetase family member 3, mitochondrial | 0.829833 | 9.2E-05 |
| G3V4P2 | METTL17 | MethyltransferasE-like protein 17, mitochondrial (Fragment) | 0.867068 | 0.002279 |
| Q02880 | TOP2B | DNA topoisomerase 2-beta | 1.12624 | 0.009853 |
| Q14118 | DAG1 | Dystroglycan | 0.883358 | 0.007469 |
| P42345 | MTOR | Serine/threoninE-protein kinase mTOR | 1.1882 | 0.000123 |
| Q6PI78 | TMEM65 | Transmembrane protein 65 | 1.20837 | 2.14E-05 |
| Q9HAF1 | MEAF6 | Chromatin modification-related protein MEAF6 | 1.15814 | 0.001241 |
| F5GXJ6 | PPP2R2D | Serine/threoninE-protein phosphatase 2A 55 kDa regulatory subunit B delta isoform | 1.17511 | 0.000351 |
| F8WD51 | UPP1 | Uridine phosphorylase 1 | 1.14782 | 0.002531 |
| Q9BZQ8 | FAM129A | Protein Niban | 1.30931 | 2.95E-10 |
| H0YBL1 | IMPA1 | Inositol monophosphatase 1 (Fragment) | 1.14196 | 0.003725 |
| K4ENJ5 |  | Beta actin (Fragment) | 0.825567 | 6.09E-05 |
| B7Z8V5 |  | cDNA FLJ51186, highly similar to Homo sapiens ADP-ribosylation factor-like 6 interacting protein 2 (ARL6IP2), mRNA | 0.870756 | 0.003016 |
| F5H2X8 | PRKAB1 | 5'-AMP-activated protein kinase subunit beta-1 | 0.742506 | 3.09E-09 |
| Q9BV19 | C1orf50 | Uncharacterized protein C1orf50 | 1.36998 | 4.91E-14 |
| H0UI22 | RARSL | Arginyl-tRNA synthetasE-like, isoform CRA_e | 1.15497 | 0.001551 |
| D6R9P3 | HNRNPAB | Heterogeneous nuclear ribonucleoprotein A/B | 1.13 | 0.007876 |
| Q9BRJ2 | MRPL45 | 39S ribosomal protein L45, mitochondrial | 0.735344 | 1.11E-09 |
| E9PRI4 | RPS6KA1 | Ribosomal protein S6 kinase | 1.15627 | 0.001417 |
| B7Z4Z4 |  | cDNA FLJ51918, highly similar to Peroxisomal membrane protein PEX14 | 1.14325 | 0.003427 |
| P83111 | LACTB | Serine beta-lactamasE-like protein LACTB, mitochondrial | 1.23498 | 1.66E-06 |
| K7EP32 | UBXN6 | UBX domain-containing protein 6 (Fragment) | 0.7895 | 1.29E-06 |
| J3KTF4 | CYBC1 | Uncharacterized protein C17orf62 (Fragment) | 0.736124 | 1.25E-09 |
| Q9H0A8 | COMMD4 | COMM domain-containing protein 4 | 1.16003 | 0.001084 |
| Q9NQ88 | TIGAR | FructosE-2,6-bisphosphatase TIGAR | 1.26985 | 3.81E-08 |
| J3KRS1 | DHRS7B | Dehydrogenase/reductase SDR family member 7B (Fragment) | 1.30759 | 3.69E-10 |
| Q9Y6X5 | ENPP4 | Ectonucleotide pyrophosphatase/phosphodiesterase family member 4 | 1.21454 | 1.21E-05 |
| B4DYY5 |  | cDNA FLJ55671, highly similar to Ubiquitin-associated protein 2-like | 1.13539 | 0.005657 |
| Q9HD33 | MRPL47 | 39S ribosomal protein L47, mitochondrial | 1.12998 | 0.007883 |
| Q9P1F3 | ABRACL | Costars family protein ABRACL | 1.2227 | 5.59E-06 |
| B4DHW9 |  | cDNA FLJ56439, highly similar to Pantothenate kinase 4 (EC 2.7.1.33) | 0.820049 | 3.52E-05 |
| Q13315 | ATM | SerinE-protein kinase ATM | 1.48457 | 6.02E-23 |
| B4DF39 |  | cDNA FLJ59119, highly similar to Receptor expression-enhancing protein 6 | 1.21853 | 8.33E-06 |
| B4DWW1 | ARL1 | ADP-ribosylation factor-like protein 1 | 1.13901 | 0.004503 |
| P62328 | TMSB4X | Thymosin beta-4 | 1.20283 | 3.51E-05 |
| B4DUA6 | #N/A | cDNA FLJ61409, highly similar to 1-acyl-sn-glycerol-3-phosphate acyltransferase gamma (EC 2.3.1.51) | 0.885349 | 0.008558 |
| Q9BY32 |  | Inosine triphosphate pyrophosphatase | 1.15183 | 0.001928 |
| Q5TEC6 | HIST2H3PS2 | Histone H3 | 1.18711 | 0.000135 |
| Q45KI0 | PRSS1 | Trypsin I (Fragment) | 1.29589 | 1.65E-09 |

Notes: A total of 185 differentially expressed proteins were identified between IH and IH+E2 group, with 107 were up-regulated and 78 were down-regulated in IH+E2 group. The Uniprot accessions, gene names, fold changes and *p* values of all the differentially expressed proteins are listed.
